# Supplementary material for: Effect of Different Omega-6/Omega-3 Polyunsaturated Fatty Acid Ratios on the Formation of Monohydroxylated Fatty Acids in THP-1 Derived Macrophages
Source: MDPI journal article supplement (doi:10.3390/biology4020314), 2015-04-09
Supplement: s1 [file s1]

Supplemental Materials

**Table S1.** Limit of quantitation (LOQ) for the metabolites assayed. The LOQ is calculated as limit of detection (LOD)  $\times$  3 (determined as signal to noise, RMS, for smoothed signals).

| Target  | LOQ [pg per sample] |
|---------|---------------------|
| 5-HEPE  | 3                   |
| 12-HEPE | 31                  |
| 15-HEPE | 4                   |
| 18-HEPE | 10                  |
| 5-HETE  | 3                   |
| 12-HETE | 21                  |
| 15-HETE | 2                   |
| 4-HDHA  | 16                  |
| 14-HDHA | 6                   |
| 17-HDHA | 8                   |
| 8-HEPE  | 8                   |
| 9-HEPE  | 10                  |
| 20-HDHA | 7                   |
| 16-HDHA | 3                   |
| 13-HDHA | 13                  |
| 11-HETE | 17                  |
| 10-HDHA | 3                   |
| 8-HETE  | 4                   |
| 11-HDHA | 17                  |
| 7-HDHA  | 1                   |
| 9-HETE  | 18                  |
| 8-HDHA  | 63                  |

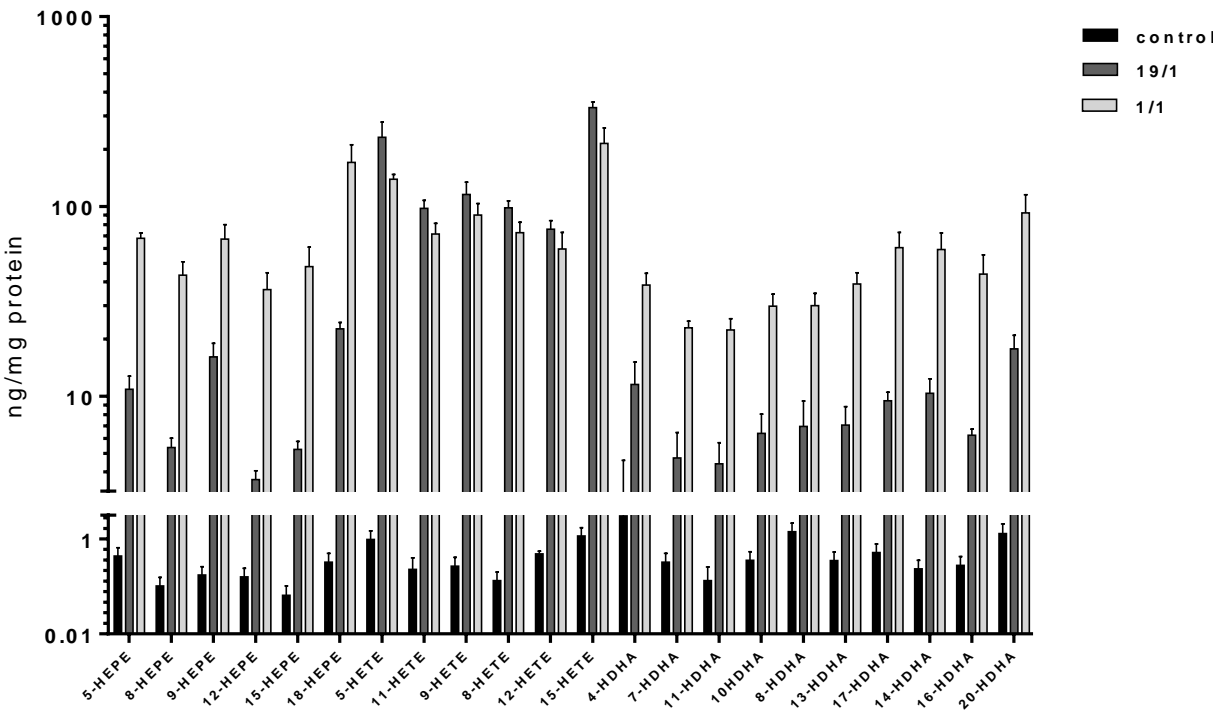

**Figure S1.** Monohydroxylated lipid metabolites in THP-1 macrophages incubated in control medium compared to the levels found with PUFA addition (ng/mg cell protein).

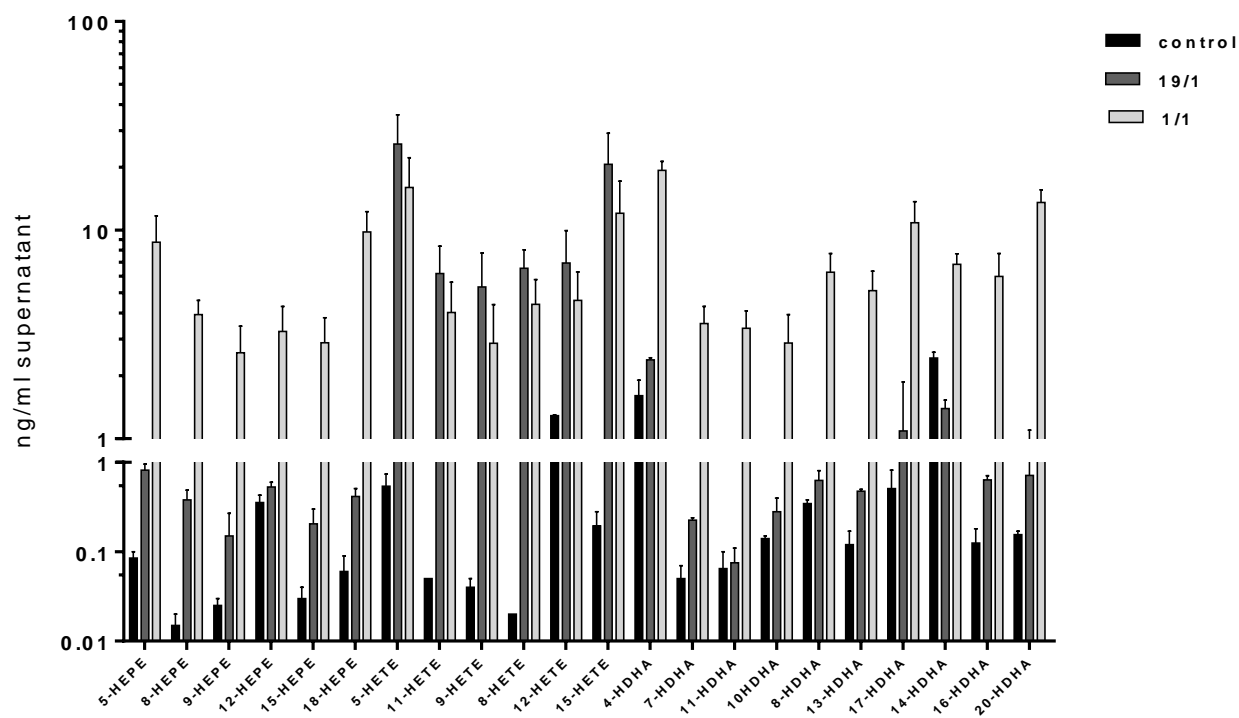

**Figure S2.** Baseline levels of lipid metabolites: Cell-free incubations of tissue culture media containing the two different PUFA ratios were carried out, and compared to incubations of cell culture media without PUFA addition.
